# Supplementary material
Source: PubMed Central journal article supplement (PMC2978979)
Supplement: mmc1.pdf [file mmc1.pdf]

## A Common Molecular Mechanism Underlies Two Phenotypically Distinct 17p13.1 Microdeletion Syndromes

Adam Shlien, Berivan Baskin, Maria Isabel W. Achatz, Dimitrios J. Stavropoulos, Kim E. Nichols, Louanne Hudgins, Chantal F. Morel, Margaret P. Adam, Nataliya Zhukova, Lianne Rotin, Ana Novokmet, Harriet Druker, Mary Shago, Peter N. Ray, Pierre Hainaut, and David Malkin

Figure S1. Copy Number of *ATP1B2* and *WRAP53*, *TP53*'s Neighboring Genes

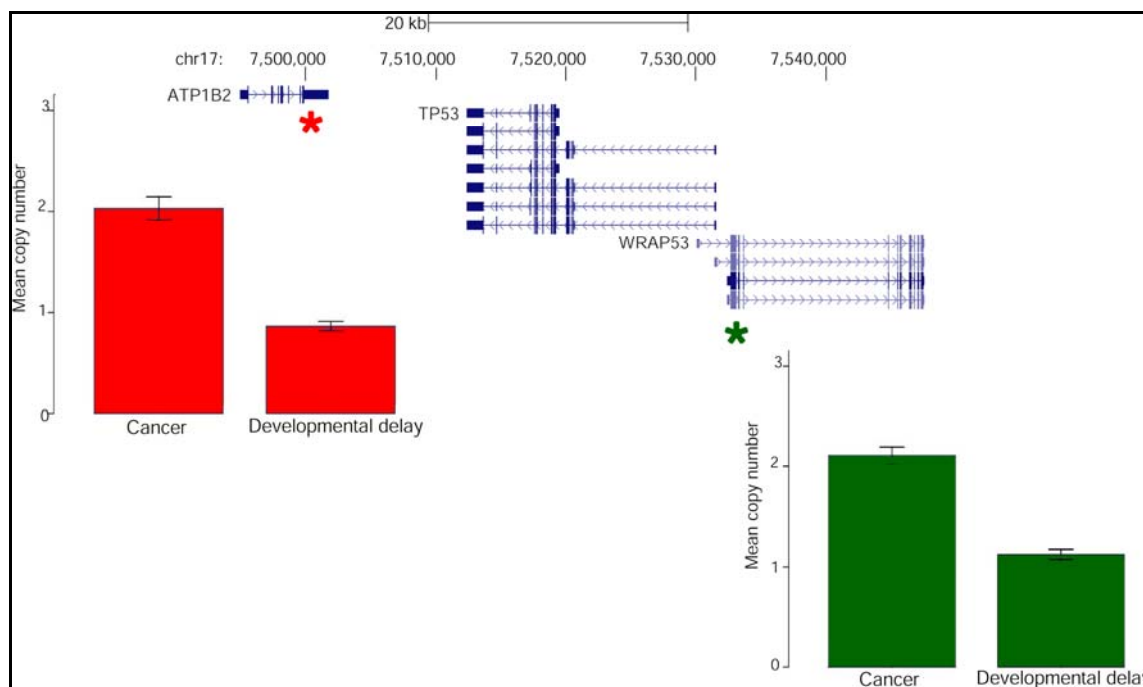

To determine the extent of 17p13.1 CNVs, probes were designed in *TP53*'s neighboring genes, *ATP1B2* and *WRAP53* and assessed by qPCR. Probes were located in the closest exon to *TP53* (red and green asterisks). While all patients' harbored deletions at *TP53*, only the developmental delay patients' deletions included *ATP1B2* (telomeric) and *WRAP53* (centromeric). Both *ATP1B2* and *WRAP53* were diploid in all cancer patients (mean copy number = 2.03 and 2.11, respectively). However, all patients with DD were hemizygosely deleted for both flanking genes (mean copy number = 0.87 [*ATP1B2*] and 1.13 [*WRAP53*]), a significant reduction as compared to the cancer patients ( $p=2.90 \times 10^{-4}$  [*ATP1B2*] and  $2.42 \times 10^{-8}$  [*WRAP53*]).

**Figure S2. Pedigrees**

Patient 2723 - DD

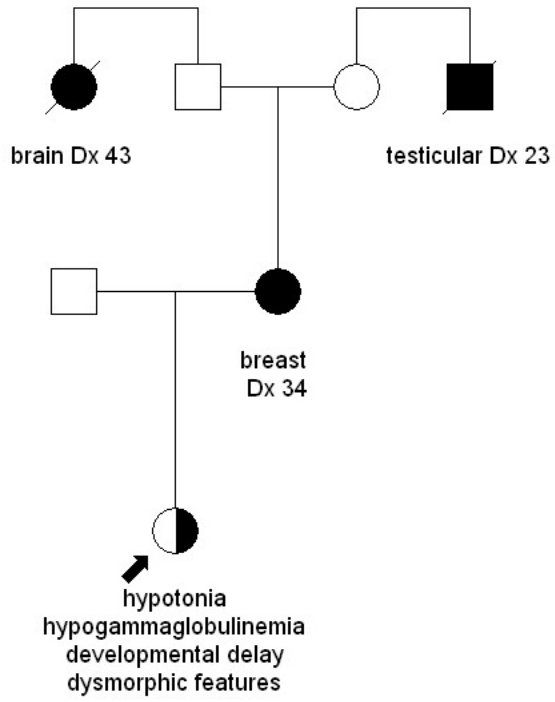

Patient 3026 - DD

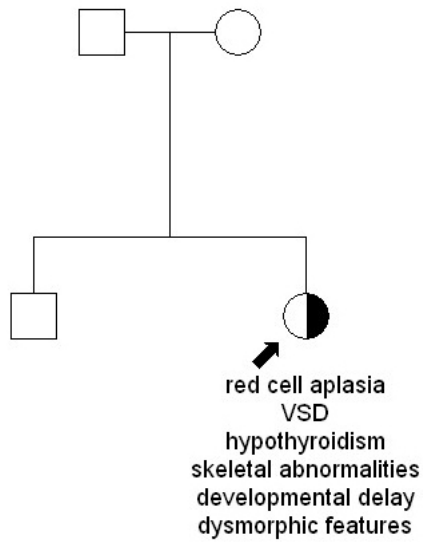

Patient 3148 - DD

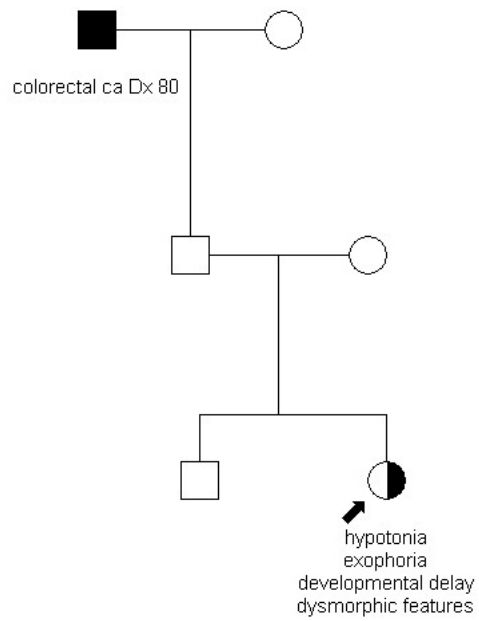

Patient 3354 – DD

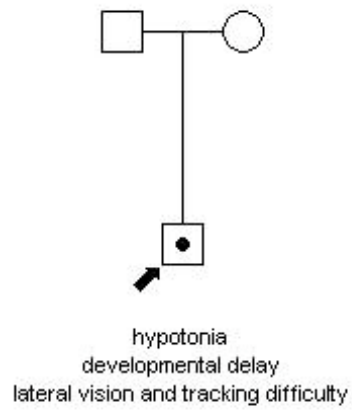

Patient 3332 - Cancer

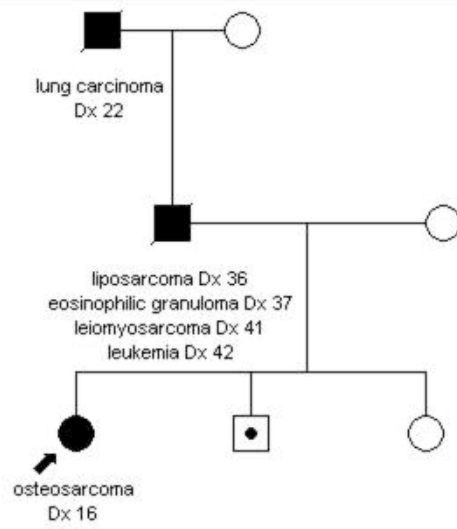

Patient Y47- Cancer

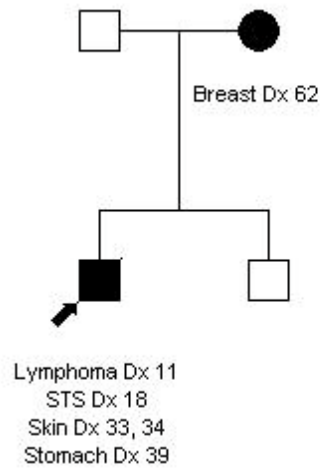

Patient Y20 - Cancer

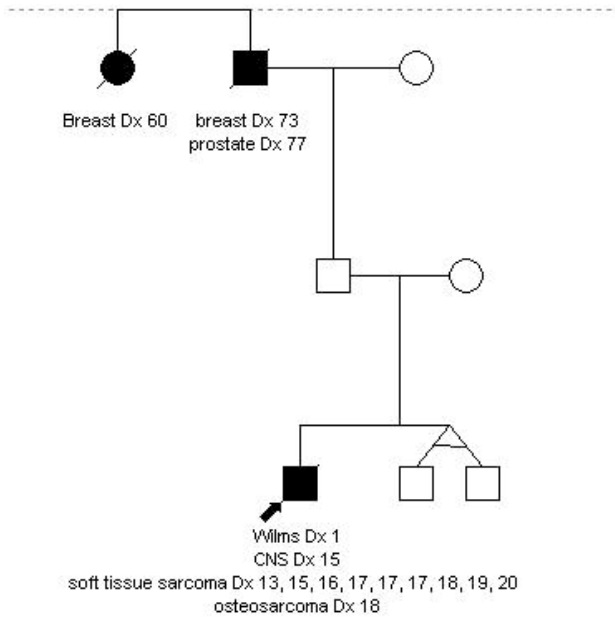

Patient 2760 - Cancer

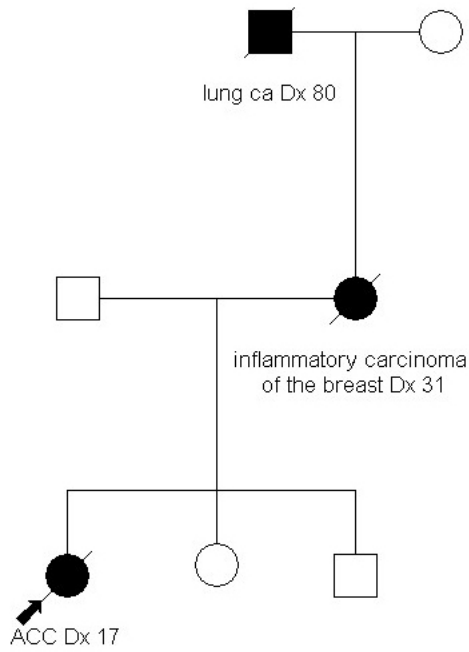

**Figure S3. Design of Ultra High-Resolution Array**

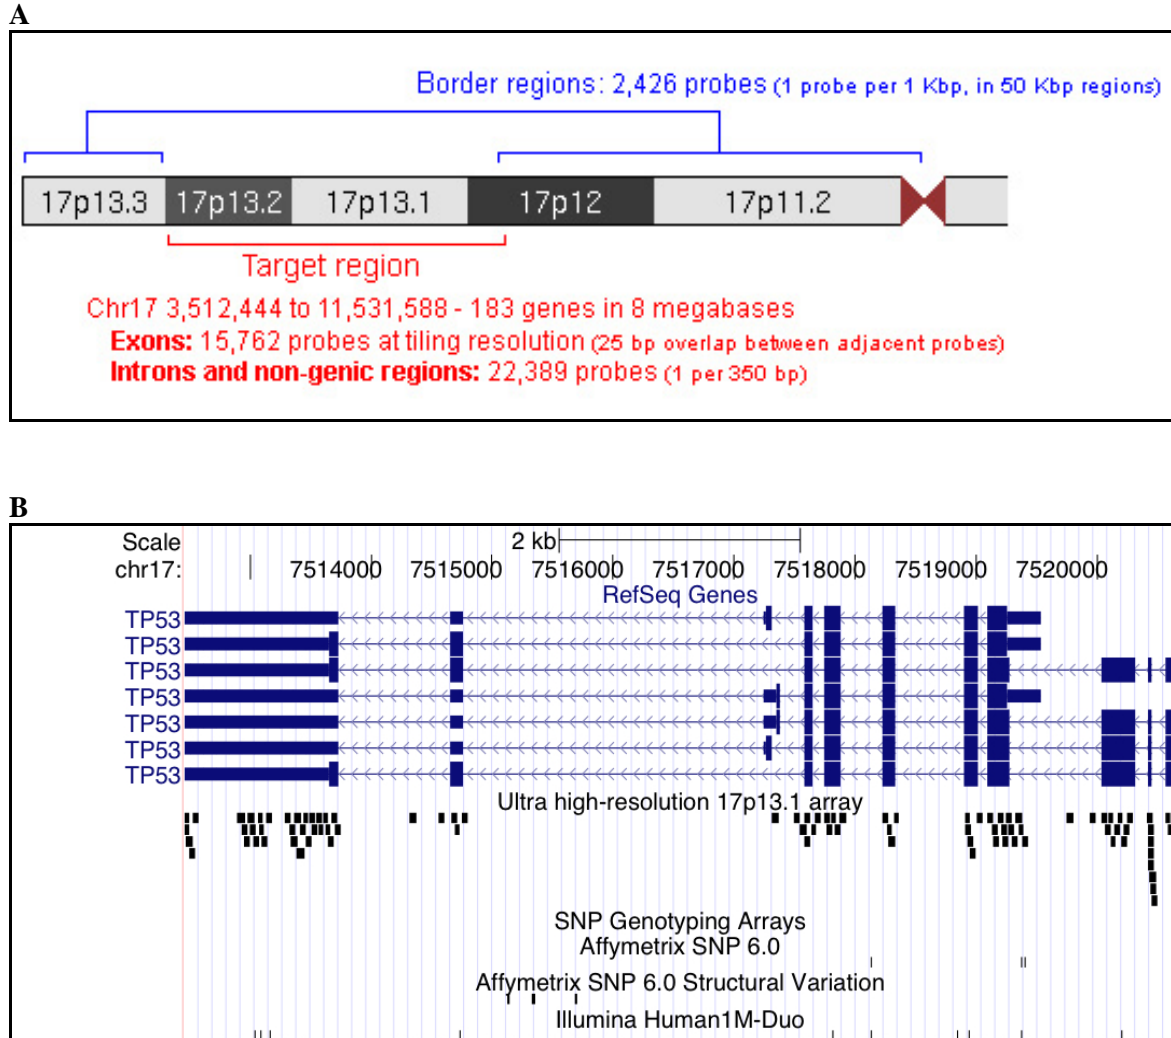

(a) 40,577 oligonucleotide probes were placed on the short arm of chromosome 17, in which an 8 Mb target region around *TP53* (red) was covered in ultra high-resolution. Of the 38,061 in the target region, 15,762 (41%) were designed on exons. Exonic probes were overlapping and tiled across all exons, of all alternative splice variants, for every gene (183) in the target region. The remaining probes in the target region (22,389) were placed in intronic or non-genic regions at a resolution of one probe per 350 nucleotides. An additional 2,426 probes were placed in the border regions (blue) from the target region to the telomere and centromere. The borders regions were covered at low resolution with 1 probe per 1 Kbp, in 50 Kbp regions. The following 183 genes are covered at tiling resolution by this novel platform: **Telomere**....-*TAX1BP3*-*TMEM93*-*P2RX5*-*ITGAE*-*GSG2*-*C17orf85*-*CAMKK1*-*P2RX1*-*ATP2A3*-*ZZEF1*-*CYB5D2*-*ANKFY1*-*UBE2G1*-*SPNS3*-*SPNS2*-*MYBBP1A*-*GGT6*-*SMTNL2*-*ALOX15*-*PELP1*-*ARRB2*-*MED11*-*CXCL16*-*ZMYND15*-*TM4SF5*-*VMO1*-*GLTPD2*-*PSMB6*-*PLD2*-*MINK1*-*CHRNE*-*LOC100130311*-*GP1BA*-*SLC25A11*-*RNF167*-*PFN1*-*ENO3*-*SPAG7*-*CAMTA2*-*INCA1*-*KIF1C*-*GPR172B*-*ZFP3*-*ZNF232*-*USP6*-*ZNF594*-*C17orf87*-*RABEP1*-*NUP88*-*RPAIN*-*C1QBP*-*DHX33*-*DERL2*-*MIS12*-*NLRP1*-*WSCD1*-*AIPL1*-*FAM64A*-*PITPNM3*-*KIAA0753*-*TXNDC17*-*MED31*-*C17orf100*-*SLC13A5*-*XAF1*-*FBXO39*-*TEKT1*-*ALOX12P2*-*ALOX12*-*RNASEK*-*C17orf49*-*BCL6B*-*SLC16A13*-*SLC16A11*-*CLEC10A*-*ASGR2*-*ASGR1*-*DLG4*-*ACADVL*-*DVL2*-*PHF23*-

GABARAP-DULLARD-C17orf81-CLDN7-SLC2A4-YBX2-EIF5A-GPS2-NEURL4-ACAP1-KCTD11-TMEM95-TNK1-PLSCR3-C17orf61-NLGN2-SPEM1-C17orf74-TMEM102-FGF11-CHRNA1-ZBTB4-AMAC1L3-POLR2A-TNFSF12-TNFSF12/TNFSF13-TNFSF13-SENAP3-EIF4A1-SNORA48-SNORD10-SNORA67-CD68-MPDU1-SOX15-FXR2-SHBG-SAT2-SHBG-ATP1B2-**TP53**-WRAP53-EFNB3-DNAH2-RPL29P2-KDM6B-TMEM88-LSMD1-CYB5D1-CHD3-SCARNA21-LOC284023-KCNAB3-TRAPPC1-CNTROB-GUCY2D-ALOX15B-ALOX12B-ALOXE3-HES7-PER1-VAMP2-TMEM107-C17orf59-AURKB-C17orf44-C17orf68-PFAS-SLC25A35-RANGRF-ARHGEF15-ODF4-LOC100128288-KRBA2-RPL26-RNF222-NDEL1-MYH10-CCDC42-SPDYE4-MFSD6L-PIK3R6-PIK3R5-NTN1-STX8-WDR16-USP43-DHRS7C-GLP2R-RCVRN-GAS7-MYH13-MYH8-MYH4-MYH1-MYH2-MYH3-SCO1-C17orf48-TMEM220-PIRT-FLJ45455-DNAH9-...-**Centromere**. (b) Shown are the positions of probes (black squares and rectangles) across the region of 17p13.1 containing *TP53*. All exons (solid blue boxes), introns (dashed) and alternative transcripts of *TP53* are covered. Our arrays' coverage is contrasted to that of the Affymetrix 6.0 and Illumina 1M Duo microarrays. All genes within the target region have identical coverage as *TP53*, which is here shown to demonstrate the resolution of the platform in genic regions.

**Figure S4. A Complex Event Near 17p13.1 Deletion Breakpoint**

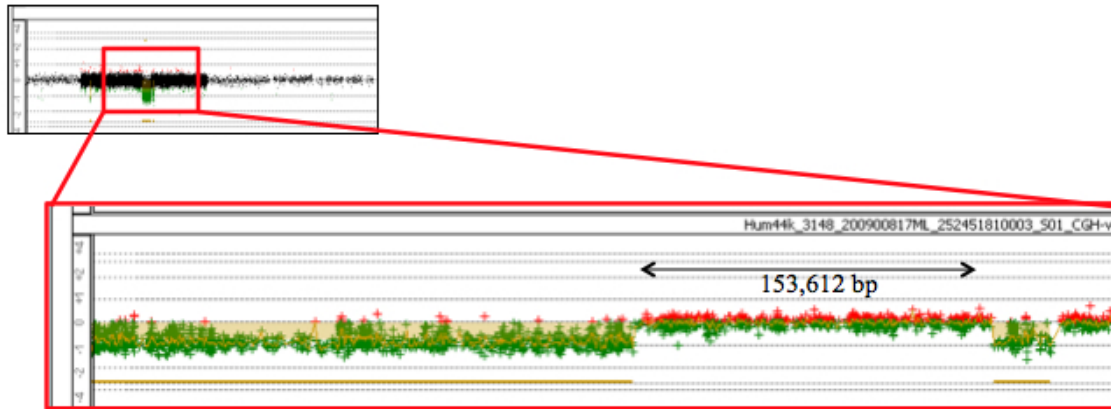

By ultra high-resolution array, an additional deletion was observed in one patient. This secondary deletion, which is distal to the primary deletion and is also hemizygous, is not a polymorphic CNV as it was not seen in other hybridizations using this platform, and is absent from the Database of Genomic Variants<sup>36</sup> and from the ultra high-resolution data released from the Genome Structural Variation Consortium<sup>37</sup>. The secondary deletions contains two genes: *EFNB3* and *DNAH2*.



**Figure S5. Breakpoint Simulation**

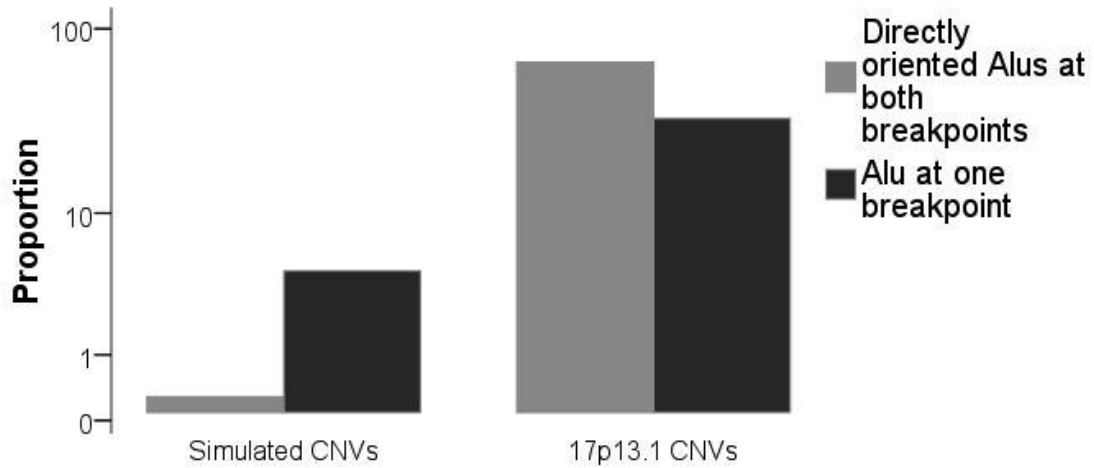

Shown are the proportion of CNVs whose breakpoints overlap with an Alu retrotransposon. We performed 10,000 simulation experiments in which randomly distributed CNVs were assessed for Alu overlap. Experiments were done on simulated CNVs sized 10 Kb, 100 Kb, 1 Mb and 2 Mb. Across all size ranges, few simulated CNVs were found to have directly oriented Alus at both breakpoints (~1%), or an Alu at only one breakpoint (<10%). In contrast, all 17p13.1 CNV breakpoints intersected with at least one Alu element: Most 17p13.1 CNV breakpoints were found to have directly oriented Alus at both breakpoints (67%), and the remainder had an intersecting Alu at only one breakpoint (33%).

**Figure S6. Genome-wide Analysis of Gene Expression Differences in a Developmental Delay Patient**

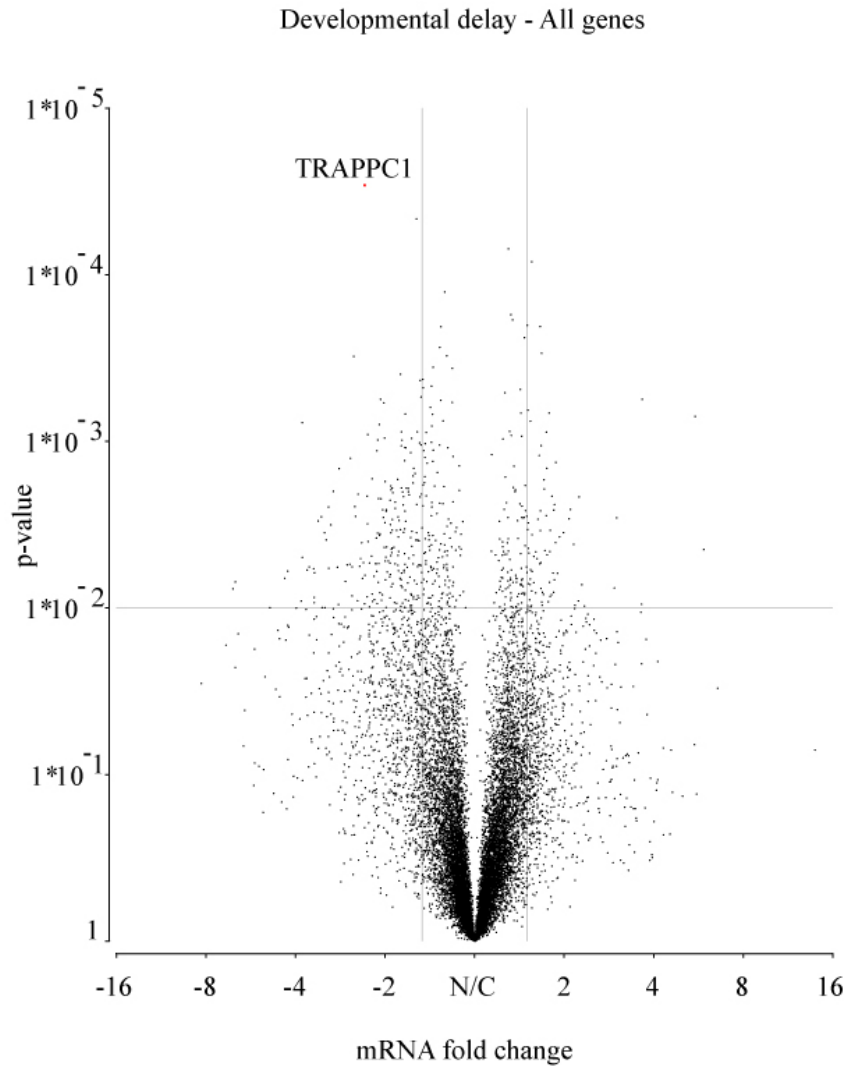

We used Affymetrix Exon arrays to look for gene expression differences in available blood-derived RNA. Gene expression values (x axis), expressed as a fold change relative to controls, are shown for all genes (circles). The p value of each genes' expression change is indicated (y axis, in reverse order). Grey gridlines delineate regions of the plot containing significantly under expressed genes (top left;  $p < 0.01$  and  $< -1.5$  fold change) or significantly over expressed genes (top right;  $p < 0.01$  and  $> 1.5$  fold change). For a patient with a large 17p13.1 CNV and DD, *TRAPPC1* (red) was found to be the most significantly under expressed gene in the transcriptome.

**Table S1. Initial Sample Ascertainments**

|   | <b>Hospital</b>                        | <b>Patients screened</b> | <b>Patients with 17p13.1 microdeletion</b> | <b>Reason for screen</b>                                                                          | <b>Method</b>                |
|---|----------------------------------------|--------------------------|--------------------------------------------|---------------------------------------------------------------------------------------------------|------------------------------|
| 1 | The Hospital for Sick Children         | 230                      | 2                                          | Suspected LFS, <i>TP53</i> sequencing wild type                                                   | MLPA                         |
| 2 | Stanford University School of Medicine | 400                      | 1                                          | Many                                                                                              | Array CGH (44K array)        |
| 3 | Emory University School of Medicine    | 3,374                    | 1                                          | Many                                                                                              | Array CGH (EmArray Cyto6000) |
| 4 | Children's Hospital of Philadelphia    | 487                      | 1                                          | Neurological or developmental issues                                                              | Illumina Hap550 BeadChip     |
| 5 | Hospital A.C. Camargo                  | 13                       | 2                                          | Suspected LFS, <i>TP53</i> sequencing wild type                                                   | MLPA                         |
| 6 | University Health Network, Toronto     | 20                       | 1                                          | Presence of multiple issues, including dysmorphologies, congenital delay or learning disabilities | Array CGH (Gene DX)          |
|   | <b>Total:</b>                          | <b>4,524</b>             | <b>8</b>                                   |                                                                                                   |                              |

**Table S2. Primer Probes Used for qPCR Assay**

| <b>Primer name</b> | <b>Orientation</b>          | <b>Sequence</b> |
|--------------------|-----------------------------|-----------------|
| chr17:7,067,522    | TAAGAAAACAAATACCTGGAAGCAC   | Forward         |
| chr17:7,067,522    | GATACTTGTTCTGGGTCAGTTCATC   | Reverse         |
| Primer 5'200k      | AGGTACCCGCCACCTCT           | Forward         |
| Primer 5'200k      | GGGTGGCTGCCTTTAAGT          | Reverse         |
| chr17:7,085,488    | AAGTAGAACTGACCAACTGCAAAAG   | Forward         |
| chr17:7,085,488    | CTCTGTGACTTTCTTGCATCTTGTA   | Reverse         |
| chr17:7,089,927    | AATAACTTGCATTTTCGACTTACAGC  | Forward         |
| chr17:7,089,927    | GGGATTCCCTAGATTATCCCTAGTT   | Reverse         |
| 5'200K#1           | TGAGAAAACAGCCATAAAGATCA     | Forward         |
| 5'200K#1           | CCCGAGAGGATCACAAAGTT        | Reverse         |
| chr17:7,103,403    | CGTTTTTATTAGGAGAGCAGTACAA   | Forward         |
| chr17:7,103,403    | CACCATTGGTACTGGGATAGATAC    | Reverse         |
| chr17:7,108,123    | ATTCTCACATACCCTGCTTATTCTG   | Forward         |
| chr17:7,108,123    | AGAGGAAAATGAAATGAGAGAGAGC   | Reverse         |
| 5'200K#2           | CAAGGCAAATGATATTCCAGGT      | Forward         |
| 5'200K#2           | GCCCAAGAATGAAGTCCTGA        | Reverse         |
| chr17:7,126,819    | AATGCACGTGTTAATTTATGAAACC   | Forward         |
| chr17:7,126,819    | TGTTAACAATATCCTTGACAGTGCT   | Reverse         |
| chr17:7,128,845    | CTGCCATCACTTCTTCTTCTCC      | Forward         |
| chr17:7,128,845    | GCTGGTCGAATAATAGAAAACCTAGAG | Reverse         |
| chr17:7,129,661    | GGTAGGTTTCACTTCTCTGAGTTGAG  | Forward         |
| chr17:7,129,661    | GAGAATCCAGTTGAGGCCTTTC      | Reverse         |
| chr17:7,130,108    | AGGGAGCTGACCTAGATTGGATAG    | Forward         |
| chr17:7,130,108    | CTTGAGTAAGGTAAGTTATGCCACTG  | Reverse         |
| chr17:7,130,443    | AACACCTCTTCTCCACCTGTC       | Forward         |
| chr17:7,130,443    | GCAAATAGAAGGAAGACGTAGGG     | Reverse         |
| chr17:7,130,605    | CTCTTTTAGAGCAGGAGGTGAAAC    | Forward         |
| chr17:7,130,605    | CCCTAAATACTCAAGTTCTGTGCTG   | Reverse         |
| chr17:7,131,853    | CTATAAAGTCACTGCTGAAGACAAGC  | Forward         |
| chr17:7,131,853    | ATCCTCAAGTACCTCCACAATAGG    | Reverse         |
| chr17:7,134,553    | CCAGTTACATTAGTGGCTTCTGC     | Forward         |
| chr17:7,134,553    | TCACTATTCCCTTACCACCTTCC     | Reverse         |
| chr17:7,134,917    | CTAGAGAAGAAACCCAGACACTGC    | Forward         |
| chr17:7,134,917    | GTCCTAAGTATGTCCCTGTCATCG    | Reverse         |
| chr17:7,137,705    | CTTCAAGCCAACCAGGTTTC        | Forward         |
| chr17:7,137,705    | GACTAGGGTAGGAATACCTTGAAGC   | Reverse         |
| chr17:7,137,709    | AAGCCAACCAGGTTTCACTAGTAGC   | Forward         |
| chr17:7,137,709    | GGTGGACTAGGGTAGGAATACCTTG   | Reverse         |
| chr17:7,137,790    | CTTTCAAAAAGCCTTCCAACCTAAGTC | Forward         |
| chr17:7,137,790    | AGGTGAGTACCCAGTTCTAGGTGAAG  | Reverse         |
| chr17:7,137,847    | CTTCACCTAGAACTGGGTACTCACC   | Forward         |
| chr17:7,137,847    | GCTAGAAAACCTCAGTTATGACC     | Reverse         |
| chr17:7,139,824    | GCTGAGTTTTGATCAATGTGTC      | Forward         |
| chr17:7,139,824    | AGTCTAGGGCGGTAGACATCAG      | Reverse         |
| chr17:7,140,384    | GAGGCTCCAGCAGTATCTCCTC      | Forward         |
| chr17:7,140,384    | CTGCCCTGGCTAAAAATACAAC      | Reverse         |

| <b>Primer name</b> | <b>Orientation</b>         | <b>Sequence</b> |
|--------------------|----------------------------|-----------------|
| chr17:7,140,656    | ACCCTCCACTTGCTATCTATCG     | Forward         |
| chr17:7,140,656    | TCCGAATCTTCAACTCTGAAAG     | Reverse         |
| chr17:7,140,822    | TAGACTGTTAAGGACCGACTTACCC  | Forward         |
| chr17:7,140,822    | ATTTCTTGAGCTCAGGGCTAGG     | Reverse         |
| chr17:7,143,180    | CCTTCTTTTTCTGTGCTTCC       | Forward         |
| chr17:7,143,180    | AACACTTCAGGTGAGCAGGAAC     | Reverse         |
| chr17:7,144,737    | GAGTTTACGTCATCACCCTTATCC   | Forward         |
| chr17:7,144,737    | AGACTGTTCTACGCAAATGACTGT   | Reverse         |
| chr17:7,154,486    | GAATTTCTTGTGGTGTTCCTTA     | Forward         |
| chr17:7,154,486    | CAAGTCAAAGATGGAAAACTGAT    | Reverse         |
| chr17:7,155,157    | GACTTCCAGGTATGTAGATGGTCTG  | Forward         |
| chr17:7,155,157    | CATAAACCGCTAACCCATCCTC     | Reverse         |
| chr17:7,157,782    | GAACTCGCTACAACTCCTTG       | Forward         |
| chr17:7,157,782    | GATACACACAAGTCACTGGGTTC    | Reverse         |
| chr17:7,159,682    | ACGGTGTATTATGGCTCCTTAG     | Forward         |
| chr17:7,159,682    | CCTCTGTACAGTTGTTACTGACTCTG | Reverse         |
| chr17:7,161,133    | CTAGCAAGACGAGATGAGAAAAGG   | Forward         |
| chr17:7,161,133    | ACTGGGGTCTTCATGATTCC       | Reverse         |
| chr17:7,163,222    | CCACTGTCGGTTTAGGAAATCTATC  | Forward         |
| chr17:7,163,222    | GAGTAGTTCTTTCTTCCCAGGTG    | Reverse         |
| chr17:7,165,352    | AGCAGAAGACCTCAACCATCC      | Forward         |
| chr17:7,165,352    | GTAGACCTGAACGCTTCCTTG      | Reverse         |
| chr17:7,165,804    | CTTCTCATCTAGCTCTTCCACTTTC  | Forward         |
| chr17:7,165,804    | GCTTATGTTTTCTCTGTCTCGTAGG  | Reverse         |
| 5'200k#8           | ACCTGGAGCCCCAGAAG          | Forward         |
| 5'200k#8           | CTGTGAGCTGCCGAGTGCTA       | Reverse         |
| 5'200K#9           | AGGGTTCCTCCACATCCAG        | Forward         |
| 5'200K#9           | TTCTGGGCAGCTCAGTCC         | Reverse         |
| Primer 5'50k       | TGAGGTGGGCATCACTAACA       | Forward         |
| Primer 5'50k       | CCCAGAAATGGACGTTTGAC       | Reverse         |
| ATP1B2ex7b         | TGTGAAGTTCCTGAATGTGACC     | Forward         |
| ATP1B2ex7b         | CGACATTCTACATTCACCTCCA     | Reverse         |
| ATP1B2exon7        | CAGACGATGAGCGAGACAAG       | Forward         |
| ATP1B2exon7        | TGTTGATGCGGAGTTTGAAG       | Reverse         |
| ATP1B2-p53         | TCCTTGGTTTGTCTACCACTCC     | Forward         |
| ATP1B2-p53         | ACTGCTGGAATGAGGTGGAT       | Reverse         |
| ATP1B2-p53#1       | ACTAAGTTCTCTAAAATCTGGCAAGG | Forward         |
| ATP1B2-p53#1       | AGAATGGAGAGGGGGTCCTA       | Reverse         |
| ATP1B2-p53#2       | TTCCAAACATCCACTCTAACCA     | Forward         |
| ATP1B2-p53#2       | TGCATTCAAGAGGAACAAAAA      | Reverse         |
| ATP1B2-p53#3       | GCTCTTGACCTTAATTGAAATTATCT | Forward         |
| ATP1B2-p53#3       | TGATAATGGAATACCAATTTTCCTAA | Reverse         |
| ATP1B2-p53#4       | AGGTTGTGAATTACAAGTTTACTGA  | Forward         |
| ATP1B2-p53#4       | AATCTCCAATTTCTCATGG        | Reverse         |
| ATP1B2-p53#5       | CAGAGGCAAGGACAGGGACT       | Forward         |
| ATP1B2-p53#5       | ACCCAGCAGGCAAACCTAGAG      | Reverse         |
| ATP1B2-p53#6       | GGCTCAGCCTTGCTAAATCA       | Forward         |
| ATP1B2-p53#6       | GCCTCTACCAAGGATTACG        | Reverse         |

| <b>Primer name</b> | <b>Orientation</b>         | <b>Sequence</b> |
|--------------------|----------------------------|-----------------|
| ATP1B2-p53#7       | ATCTCCCAAACATCCCTCAC       | Forward         |
| ATP1B2-p53#7       | CATACCAGCTTAGATTTTAAGGTTTT | Reverse         |
| p53exon11          | TTCTGACGCACACCTATTGC       | Forward         |
| p53exon11          | TTTGGGTTTTGGGTCTTTGA       | Reverse         |
| p53exon10          | TCTGAGTCAGGCCCTTCTGT       | Forward         |
| p53exon10          | CAGTCTACCTCCCGCCATAA       | Reverse         |
| p53exon10-9        | ATTAGGCCCTCCTTGAGAC        | Forward         |
| p53exon10-9        | CCAGGGACGAGTGTGGATAC       | Reverse         |
| p53exon9           | CTGGGCATCCTTGAGTTC         | Forward         |
| p53exon9           | CTTCGAGATGTTCCGAGAGC       | Reverse         |
| p53exon9-8         | TGTCTTTGAGGCATCACTGC       | Forward         |
| p53exon9-8         | TACCTGCAATTGGGGCATT        | Reverse         |
| p53exon8           | TCCATCCAGTGGTTTCTTCTTT     | Forward         |
| p53exon8           | CCAACAACACCAGCTCCTCT       | Reverse         |
| p53exon8-7         | GAGGCATAACTGCACCCTTG       | Forward         |
| p53exon8-7         | AAGCAAGCAGGACAAGAAGC       | Reverse         |
| chr17:7,519,754    | CAAAAGCCAAGGAATACACG       | Forward         |
| chr17:7,519,754    | CTGGGGATGCAGAACTTTTC       | Reverse         |
| chr17:7,519,934    | CCAAAGGGTGAAGAGGAATC       | Forward         |
| chr17:7,519,934    | CCCCCTGCATTTCTTTTG         | Reverse         |
| chr17:7,520,031    | ACTGACCGTGCAAGTCACAG       | Forward         |
| chr17:7,520,031    | TCTGGGCTTCTTGCATTCTG       | Reverse         |
| chr17:7,520,227    | TCATCTGGACCTGGGTCTTC       | Forward         |
| chr17:7,520,227    | TCCCCGGACGATATTGAAC        | Reverse         |
| chr17:7,520,453    | GACAAGAGCAGAAAGTCAGTCC     | Forward         |
| chr17:7,520,453    | TAGCAGAGACCTGTGGGAAG       | Reverse         |
| chr17:7,523,833    | CACTCCATTAATGCAAGTACACCTC  | Forward         |
| chr17:7,523,833    | CTGTTGACTGAATAGATCCCTGAAG  | Reverse         |
| chr17:7,523,886    | AGGAGGTGCTGTCCTGAAATG      | Forward         |
| chr17:7,523,886    | TCCAAGTGGGATTGAGACTTTG     | Reverse         |
| chr17:7,524,009    | TTTTCCAGAGCAGGACCTTCC      | Forward         |
| chr17:7,524,009    | TGTATCCTGGCCCACTGATG       | Reverse         |
| chr17:7,530,048    | CAGGTGCATGGGAAGAACT        | Forward         |
| chr17:7,530,048    | ATCTCTTAGCTCGCGGTTGTT      | Reverse         |
| chr17:7,533,018    | AAACGGGAGCCTTTCTGAAG       | Forward         |
| chr17:7,533,018    | TTTTCCAGACCCCAACTCTG       | Reverse         |
| chr17:7,533,886    | CCCCGAATTCTGAAGTTATTTAGAG  | Forward         |
| chr17:7,533,886    | TCCTAATTAAGAAAGGGGAAACCT   | Reverse         |
| chr17:7,539,366    | GTGTGTAAGTCTTCTTCCAAT      | Forward         |
| chr17:7,539,366    | GAAAGGAGAAAACCCGAGAACTAT   | Reverse         |
| Primer 3'50k       | AAGCGATCCTCCTGGCTAAC       | Forward         |
| Primer 3'50k       | ATTCAAGCATGGTGGCATGT       | Reverse         |
| Primer 3'200k      | CACATTTTCCCTGAGGCAGT       | Forward         |
| Primer 3'200k      | CCCTTCCTCATTTACCTTTCC      | Reverse         |
| 3'200K#1           | CACTGGGTCCACAGAATCAT       | Forward         |
| 3'200K#1           | CAATGTTGCATGGCTTGAA        | Reverse         |
| 3'200K#2           | TCCAGCAAAGGCTGTTAAA        | Forward         |
| 3'200K#2           | TGAAGGAGAAGCTCCTGGAA       | Reverse         |

| <b>Primer name</b> | <b>Orientation</b>         | <b>Sequence</b> |
|--------------------|----------------------------|-----------------|
| 3'200K#9           | TCAGCGTTCAGGTCATTGAA       | Forward         |
| 3'200K#9           | TTCCAGAAACCCCTCTCCTT       | Reverse         |
| 3'200K#10          | CTCTGTTAGCTGCCGTGTTG       | Forward         |
| 3'200K#10          | GCAGGAAGGAGGAAAAATGA       | Reverse         |
| chr17:8,056,064    | TATTCCCCTTCTGAAAGCACTTAG   | Forward         |
| chr17:8,056,064    | GTTTCCTTCTCAAATCCTCAAAACT  | Reverse         |
| chr17:8,056,181    | TTATGGTTATTGGATCAGGCATAAG  | Forward         |
| chr17:8,056,181    | CTAGCTGGCCCACTTAAATCAC     | Reverse         |
| chr17:8,059,157    | CATTGTCTCTTCTGTGGAGAGG     | Forward         |
| chr17:8,059,157    | TGATGACCAACCATCTCTGC       | Reverse         |
| chr17:8,059,212    | GGACTTAAGTTTTGCCTTTAATGTTC | Forward         |
| chr17:8,059,212    | CAAACAGTTCATGACTCTATACACC  | Reverse         |
| chr17:8,061,386    | AGTCAAATCTTAACACATTTTGC    | Forward         |
| chr17:8,061,386    | CCACCTGTATGCCTTTTAGTTC     | Reverse         |
| chr17:8,063,581    | TCGCCAGAGTTTCTATGCTGTTAC   | Forward         |
| chr17:8,063,581    | GAAGAAGTCTGATGACCTGAG      | Reverse         |
| chr17:8,065,022    | ATAACGGGCGGACTTTTGTCT      | Forward         |
| chr17:8,065,022    | GCGCTGACAAATCTTAAAGGTG     | Reverse         |
| chr17:8,066,390    | AGACTTTACTCTGCGTGCTG       | Forward         |
| chr17:8,066,390    | AAGAACAGAACCCCTAGGAACC     | Reverse         |
| chr17:8,067,624    | GCTTCCGGACTGTAAGATCAG      | Forward         |
| chr17:8,067,624    | AGCAGAGGTTAGACTGTAGGGTAGG  | Reverse         |
| chr17:8,069,257    | AGGCCAGATTAGATTCCAATTCTC   | Forward         |
| chr17:8,069,257    | AGCACTAACGGCACTGTAAGAAC    | Reverse         |
| chr17:8,070,736    | AGGCTTAGGGCTTCGTTTTCT      | Forward         |
| chr17:8,070,736    | GTCAGTCAAGGGAAGTAAGAAAGG   | Reverse         |
| chr17:8,071,660    | CAACTCCCCAATTTACTTCCTTTAC  | Forward         |
| chr17:8,071,660    | CAGAAGAAATGGTACCAAAATCAGT  | Reverse         |
| chr17:8,081,793    | TCCCTTCCACAGTAAAGAATAACCT  | Forward         |
| chr17:8,081,793    | GGGCTATGGACATTTTGTATCATT   | Reverse         |
| chr17:8,131,927    | ATACCCAGGTTGGCTCTCACTTTC   | Forward         |
| chr17:8,131,927    | CCAGGTTAGGATTCAGGTCTCAC    | Reverse         |
| chr17:8,331,999    | TGCTAAGAGGTACAGAGGACTAAGC  | Forward         |
| chr17:8,331,999    | TCCTCACAGCTCTAGGAAACAG     | Reverse         |

QPCR cycling conditions (repeated for 40 cycles): 95°C for 10 seconds; 60°C for 15 seconds; and 72°C for 10 seconds. Preceded by 95°C for 5 minutes. Abbreviations: T<sub>m</sub>, melting temperature.
